# Supplementary material for: Genomic and biological study of fusion genes as resistance mechanisms to EGFR inhibitors
Source: PubMed Central journal article supplement (PMC9509394; doi:10.1038/s41467-022-33210-2), 2022-09-24
Supplement: 41467_2022_33210_MOESM1_ESM.pdf [file 41467_2022_33210_MOESM1_ESM.pdf]

Supplementary Fig. 1

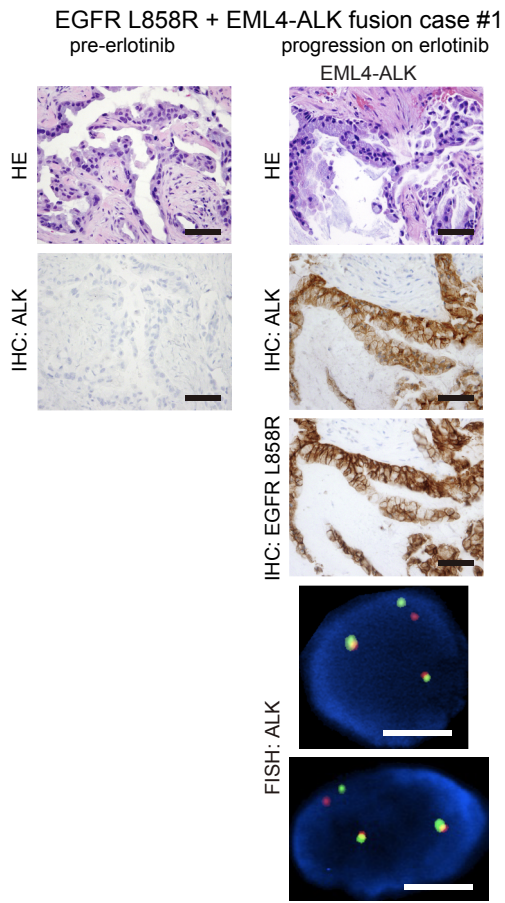

**Supplementary Fig. 1. EGFR L858R mutant adenocarcinoma acquired ALK fusion**

EGFR L858R mutant adenocarcinoma acquired ALK fusion, which was detected by ALK break-apart fluorescence in situ hybridization (FISH) – as exemplified by a split green (5' centromeric) signal and a red (3' telomeric) signal. Confirmatory immunohistochemistry (IHC) shows expression of ALK protein along with mutant-specific EGFR-L858R protein in the same tumor cells. HE: hematoxylin-eosin stain. Scale bars: black 100 μm, white 5 μm.

## Supplementary Fig. 2

contig of *NTRK2*+*GKAP1*

CCCCTTTCTCTGTCTTTTCCCTTTATTTTCAGCTACCCATCCAGTGGGATCTTATGAAACAAAACAAAACCTCAGTCTTTTACTAATGTGAT  
CTCCGAATGAAAATCTTTTAGTGATACTGTG

### GKAP1

GKAP1 breakpoint: chr9:86395297

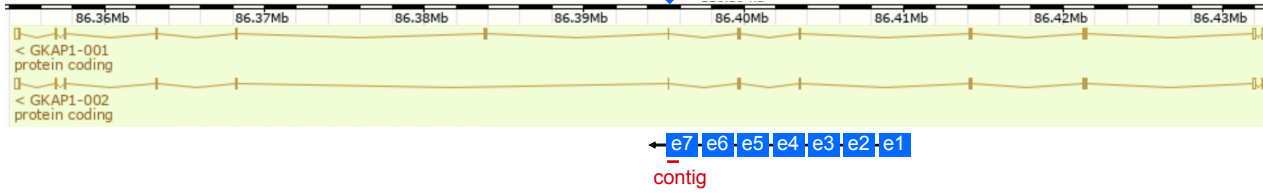

### NTRK2

NTRK2 breakpoint: chr9:87425457

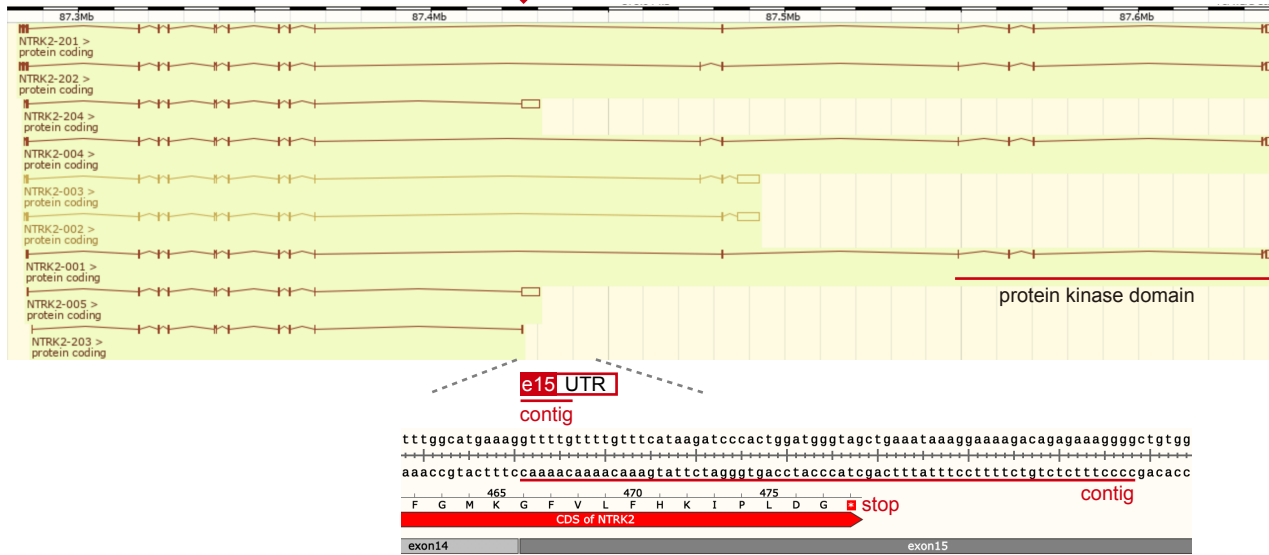

putative non-functional *GKAP1*-*NTRK2* fusion without kinase domain

e1 · e2 · e3 · e4 · e5 · e6 · e7 · e15 UTR  
contig

### Supplementary Fig. 2. Putative *GKAP1*-*NTRK2* fusion detected by RNA-based targeted sequencing

Contig detected by hybrid capture RNA-based target sequencing (Illumina TruSight™ Oncology 500) were shown in isoforms of *GKAP1* and *NTRK2*; these isoforms were obtained from the Ensembl Genome Browser (<https://asia.ensembl.org/index.html>). Contig was located at the end of *GKAP1* exon 7, and at the beginning of *NTRK2* exon15, including the stop codon and untranslated regions (UTRs). Thus, the putative *GKAP1*-*NTRK2* fusion does not include the kinase domain of *NTRK2*, and as such it cannot be functional.

Supplementary Fig. 3

**a**

chr7: 140,487,342-140,487,447

chr3: 196,921,247-196,921,354

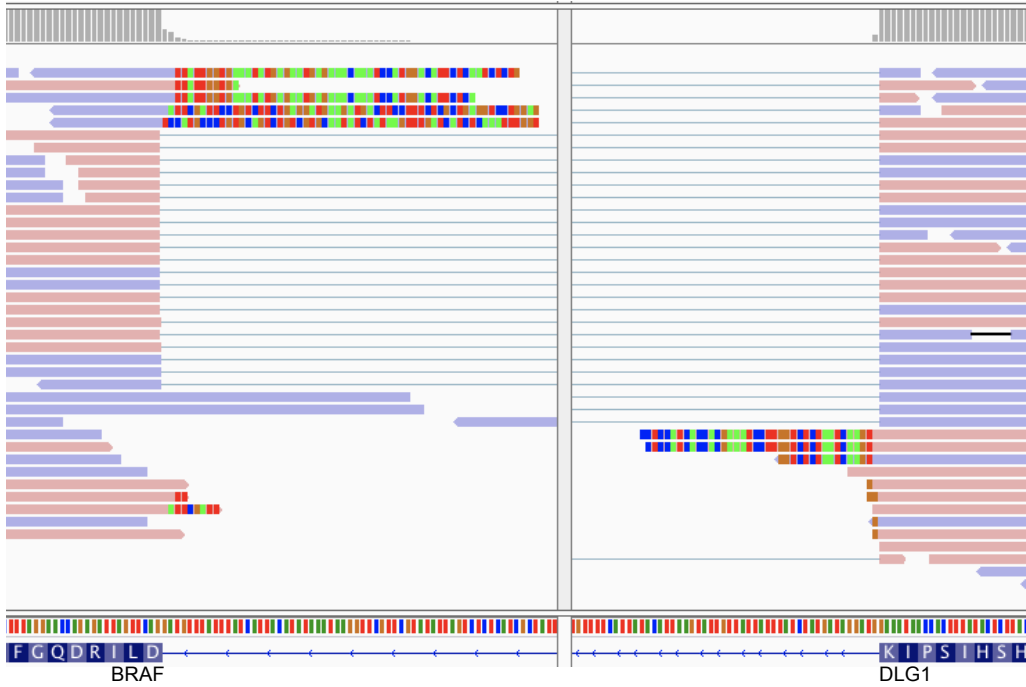

**b**

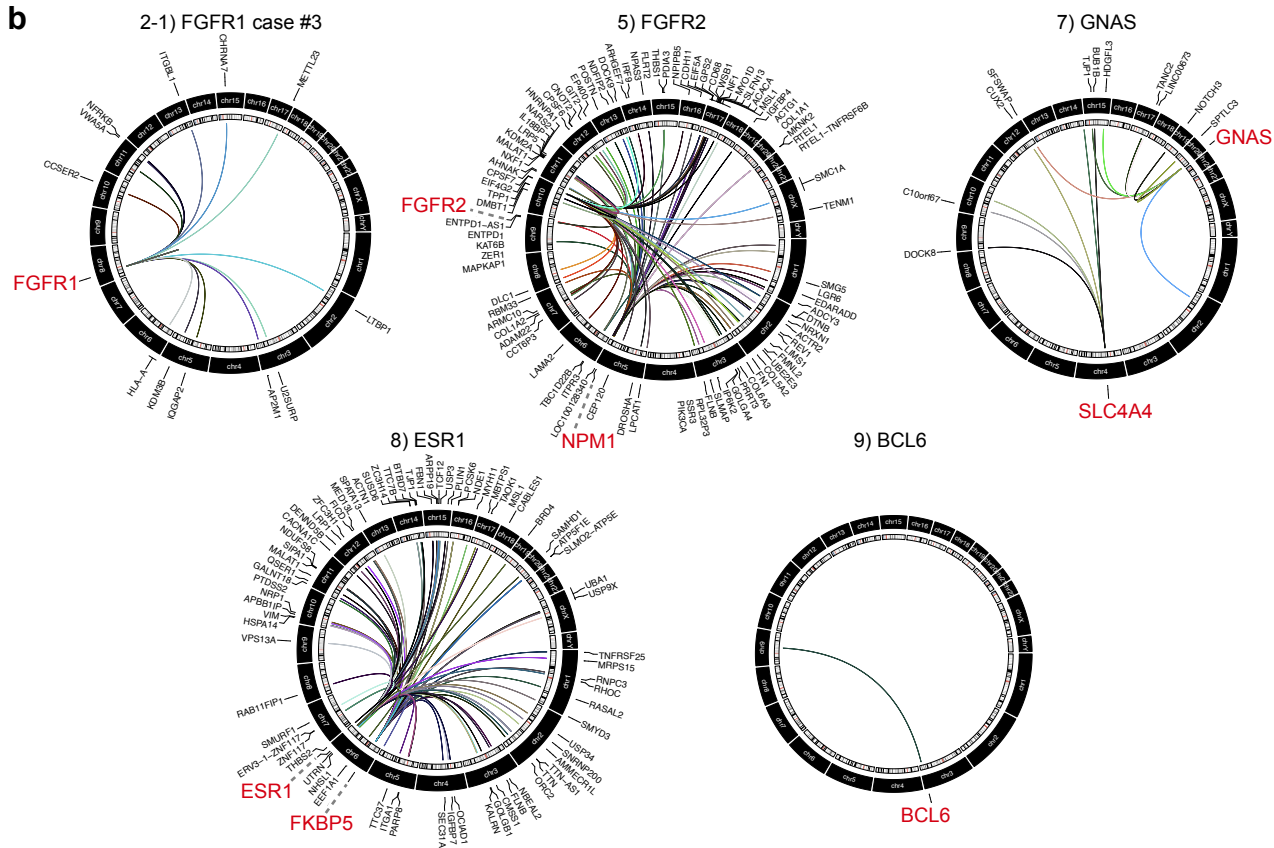

**Supplementary Fig. 3. Discordant reads with putative fusions, detected by RNA-sequencing**

(a) RNA-sequencing data showing *DLG1-BRAF* fusion visualized using IGV browser. The reads at both fusion breakpoints are presented with the direction of the reads indicated by the pink or purple colors. The rainbow colors at the ends of some reads represent the clipped region of that read, indicating bases that do not align to the original positions. The fusion callers use these clipped reads to identify the fusion partner by locating the position in the genome where the clipped region aligns best. (b) Circos plots showing discordant reads with *FGFR1*, *NPM1*, *FGFR2*, *SLC4A4*, *GNAS*, *FKBP5*, *ESR1*, and *BCL6*, detected via RNA sequencing. Samples are derived from patients with *EGFR* mutant lung cancer in which putative fusions were detected by DNA-based next generation sequencing OncoPanel.

## Supplementary Fig. 4

**a**

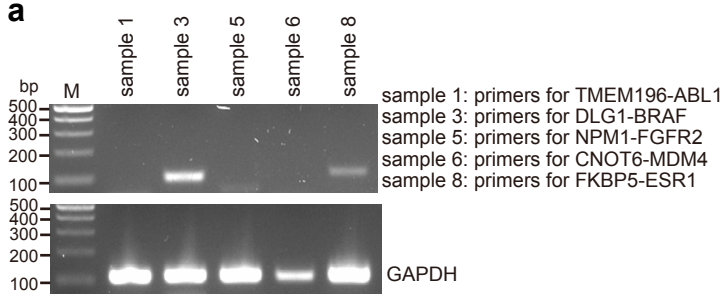

NC1: primers for TMEM196-ABL1  
NC2: primers for DLG1-BRAF  
NC3: primers for NPM1-FGFR2  
NC4: primers for CNOT6-MDM4  
NC5: primers for FKBP5-ESR1  
NC6: primers for GAPDH

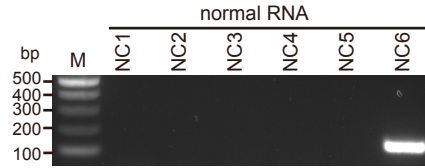

**b**

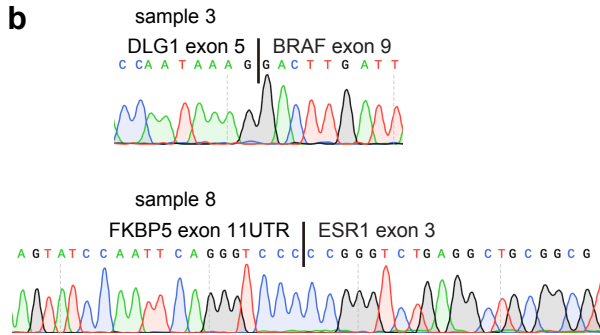

**c**

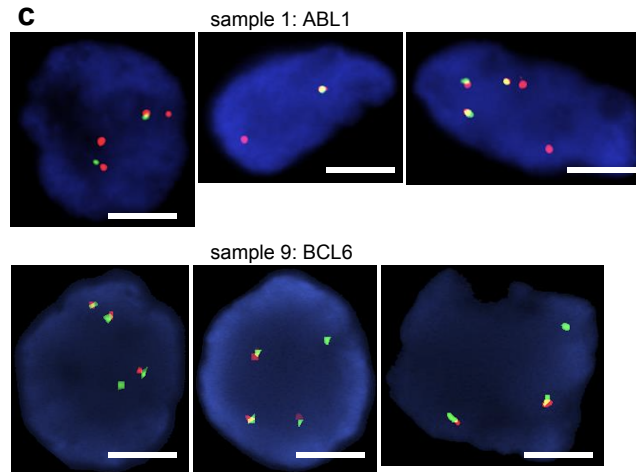

### Supplementary Fig.4. Validation of putative fusions by RT-PCR and FISH

(a) Images of PCR amplicons of cDNA generated from clinical samples and human normal RNA using indicated primers. M: 100bp-marker. NC: negative control. Strong DLG1-BRAF and faint FKBP5-ESR1 bands were detected. (b) Sequencing chromatograms of DLG1-BRAF and FKBP5-ESR1 cDNA. The fusion breakpoint was located in the FKBP5 exon untranslated region (UTR) after stop codon, resulting in production of only FKBP5 protein but not fusion protein. (c) Break-apart fluorescence in situ hybridization targeting ABL1 (green: 5' centromeric and red: 3' telomeric) and BCL6 (red: 5' centromeric and green: 3' telomeric). Split signals and loss of either signal indicate the presence of structural variants. White scale bars: 5  $\mu$ m. Source data of Sup. Fig. 4a are provided as a Source Data file.



Supplementary Fig. 5

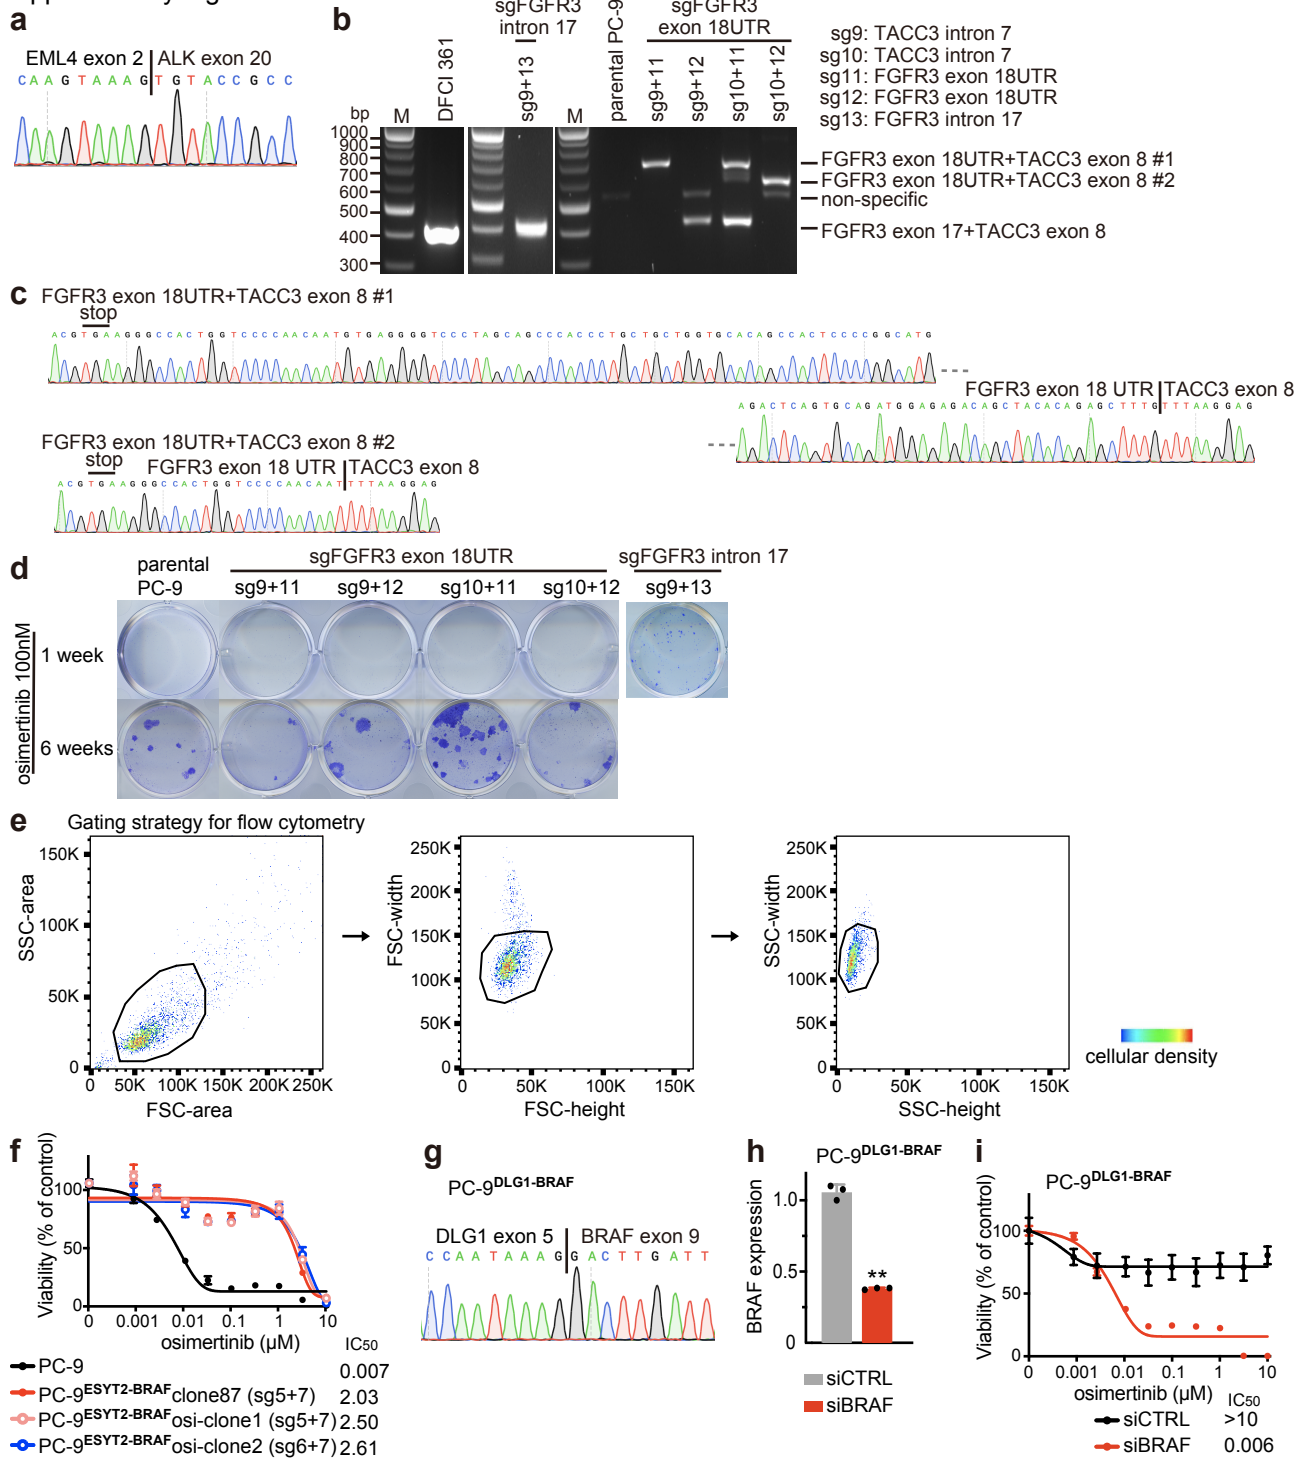

Supplementary Fig. 5. CRISPR-modified PC-9 cells expressing fusion oncogenes

(a) Sequencing chromatograms of *EML4-ALK* fusion cDNA derived from bulk CRISPR-modified PC-9 cells. (b) Images of *FGFR3-TACC3* PCR amplicons of cDNA generated from CRISPR-modified PC-9 cells and from DFCI 361, a patient-derived xenograft model. DFCI 361 and some CRISPR-modified cell models showed alternative splicing, in which exon 18 of *FGFR3* is skipped. M: 100bp-marker. (c) Sequencing chromatograms of *FGFR3-TACC3* cDNA, derived from CRISPR-modified cells without alternative splicing, where stop codons are located before fusion breakpoints. (d) Results of colony formation assays following 1 or 6 weeks of treatment with 100 nM osimertinib, using the parental PC-9 cell line or CRISPR-modified PC-9 cells that express *FGFR3-TACC3*. (e) Gating strategy used for flow cytometry studies. Pseudo-color represents cellular density. (f) Results of cell viability assay after 72 hours of osimertinib treatment. The half maximal inhibitory concentrations (IC<sub>50</sub>s) are shown for the parental PC-9 cells and for single clones from CRISPR-modified PC-9<sup>ESYT2-BRAF</sup> models, selected with or without <sup>ESYT2-BRAF</sup> to 100 nM osimertinib for 1 week (n = 3 biological replicates, mean  $\pm$  s.d.). (g) Sequencing chromatogram of fusion cDNA derived from bulk CRISPR-modified PC-9 cells. (h) *BRAF* expression was evaluated by qPCR after treatment with siRNA for 48 hours (n = 3 biological replicates, mean  $\pm$  s.d., two-sided t test, \*\*p<0.01). (i) Cell viability assay after knockdown of *BRAF* by siRNA and 72 hours of treatment with osimertinib (n = 3 biological replicates, mean  $\pm$  s.d.). Source data of Sup. Fig. 5b, f, h, and i are provided as a Source Data file.

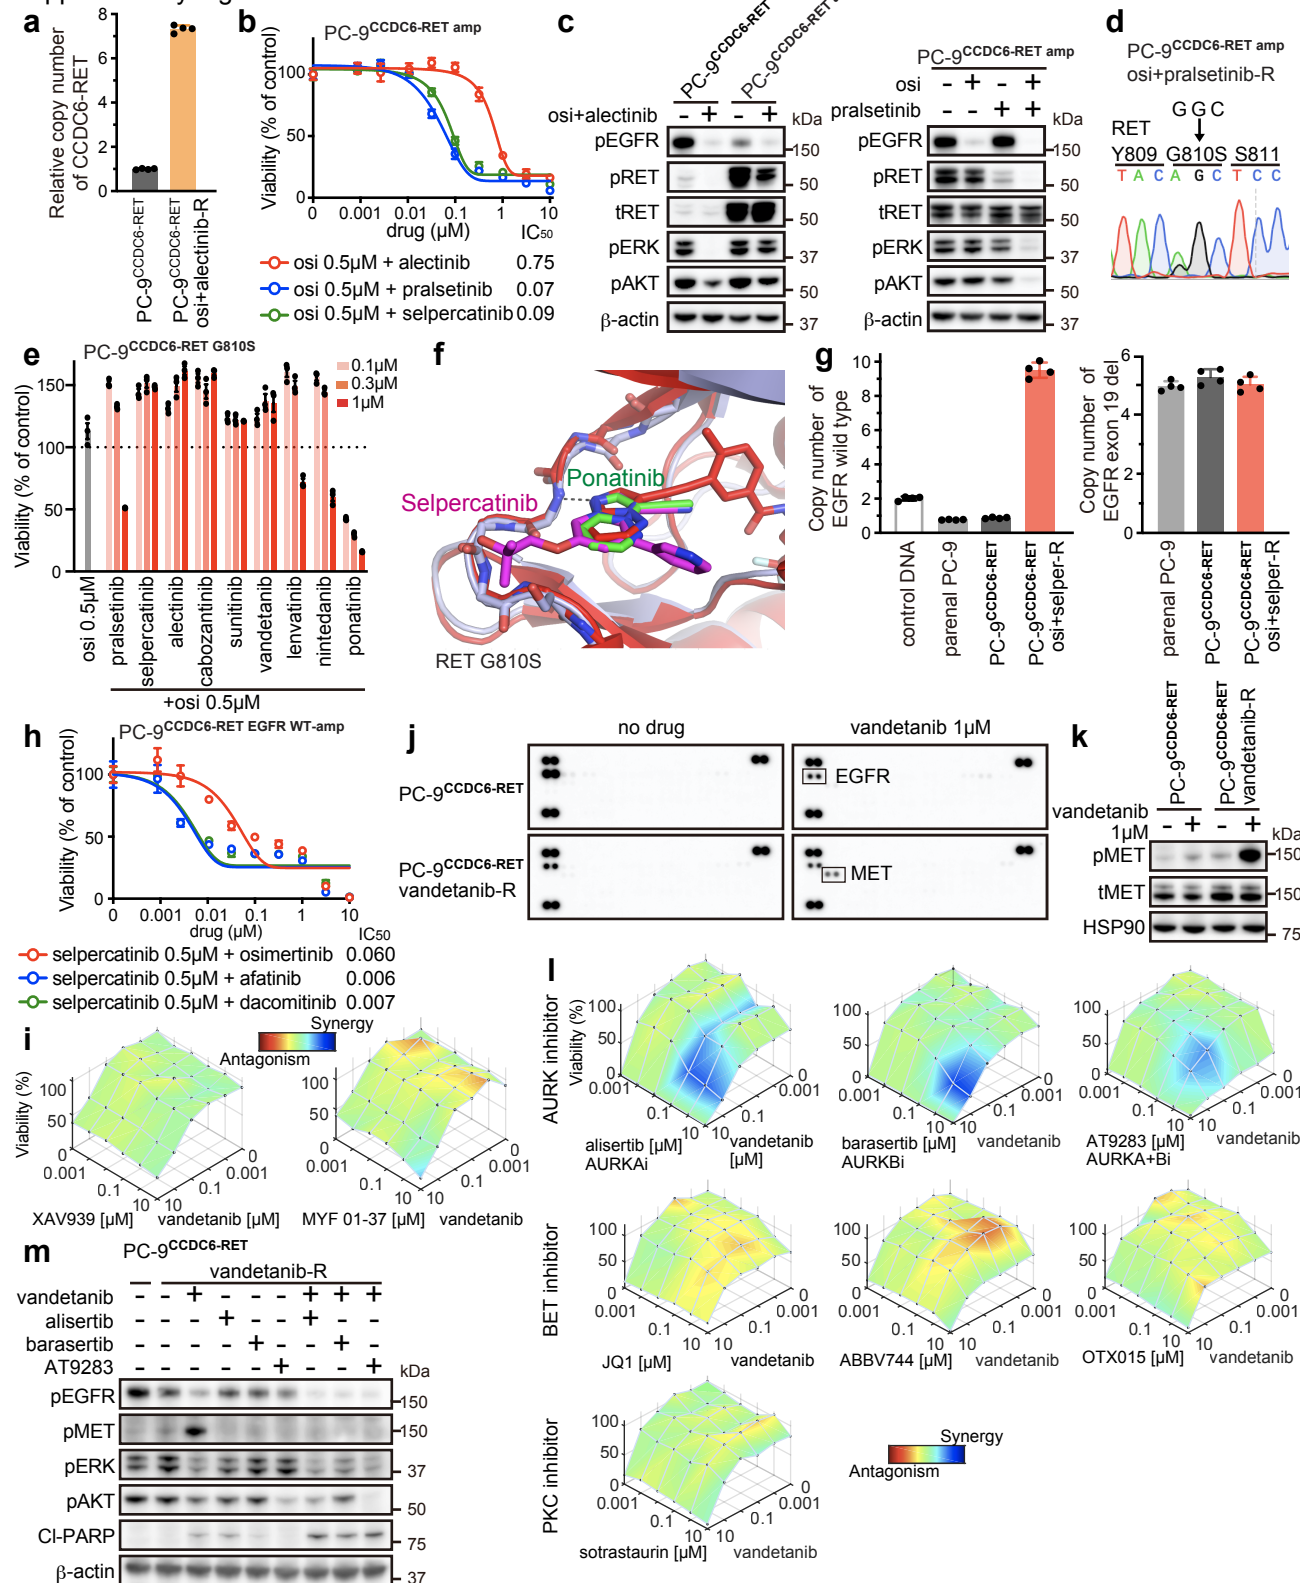Supplementary Fig. 6. Acquired resistance mechanisms in PC-9<sup>CCDC6-RET</sup> cells

(a) The relative copy number of *CCDC6-RET* evaluated by qPCR, using *RNaseP* as an internal control ( $n = 4$  biological replicates, mean  $\pm$  s.d.). (b) Cell viability assay after 72 hours of treatment with indicated drugs in PC-9 cell models that harbor *CCDC6-RET* amplification ( $n = 3$  biological replicates, mean  $\pm$  s.d.). (c) Western blot analyses following 48 hours of treatment with 0.5  $\mu\text{M}$  of indicated drugs. (d) Sequencing chromatograms of *RET* G810S derived from cDNA *CCDC6-RET* amplicon in the pralsetinib-resistant model. (e) Drug screening with use of osimertinib against the *RET* G810S mutation ( $n = 3$  biological replicates, mean  $\pm$  s.d.). (f) Computer-aided docking poses of the truncated analogues of selpercatinib and ponatinib. G810S occurs on the *RET* hinge region, near the inhibitor binding site. Docking of this hinge-binding fragment into the *RET* structure shows identical binding modes, as observed in the co-crystal structure of ponatinib bound to *KIT* (PDB ID 4U01). (g) Copy number of wild type *EGFR* and *EGFR* exon 19 deletion, evaluated by qPCR ( $n = 4$  biological replicates, mean  $\pm$  s.d.). (h) Results of cell viability assay after 72 hours of treatment with indicated drugs ( $n = 3$  biological replicates, mean  $\pm$  s.d.). (i) Synergistic inhibitory effects of vandetanib and each drug in the PC-9 cell model with *YAP1* amplification ( $n = 2$  biological replicates, mean). Pseudo-color represents synergy effects. (j) Phospho-receptor tyrosine kinase array, following 48 hours of treatment. (k) Western blot analyses following 48 hours of treatment. (l) Synergistic inhibitory effects of vandetanib and each indicated drug, in vandetanib-resistant PC-9<sup>CCDC6-RET</sup> cells ( $n = 2$  biological replicates, mean). Pseudo-color represents synergy effects. (m) Western blot analyses following 48 hours of treatment with 1  $\mu\text{M}$  of indicated drugs. Source data of Sup. Fig. 6a-c, e, g-i, and k-m are provided as a Source Data file.

Supplementary Fig. 7

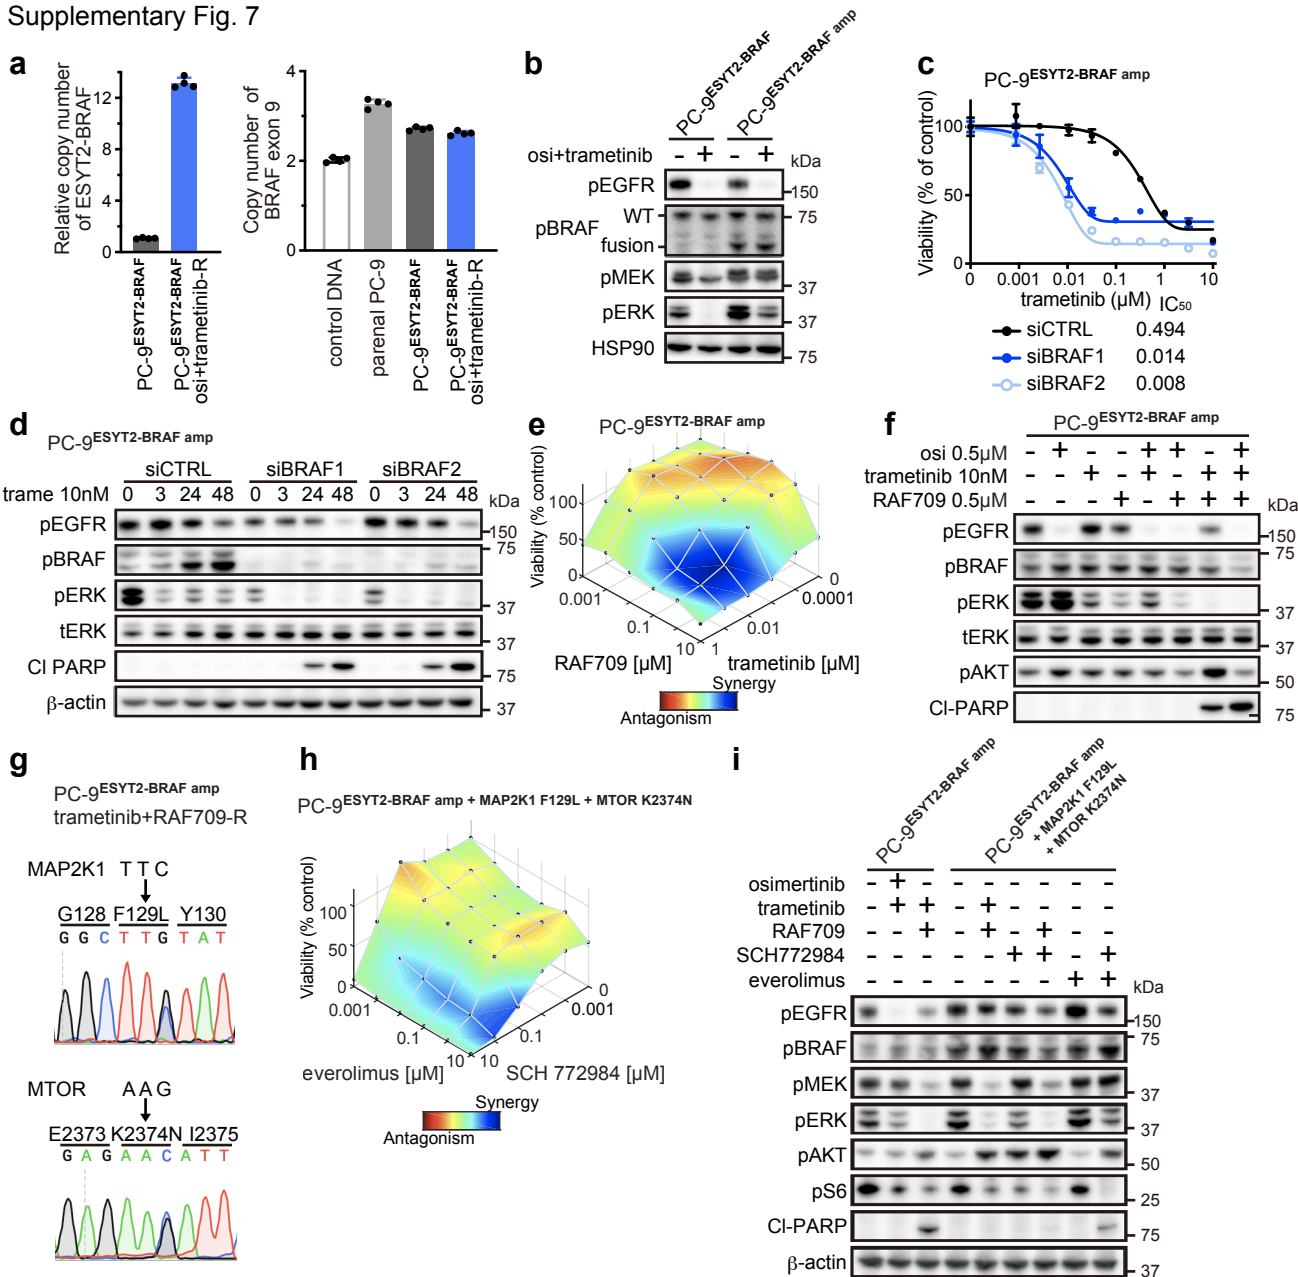

**Supplementary Fig.7. Acquired resistance mechanisms in PC-9<sup>ESYT2-BRAF</sup> cells**

(a) Relative copy number of *ESYT2-BRAF* and exact copy number of *BRAF* exon 9, evaluated by qPCR using *RNaseP* as an internal control ( $n = 4$  biological replicates, mean  $\pm$  s.d.). (b) Western blot analyses following 48 hours of treatment with 10 nM trametinib and 0.5  $\mu$ M osimertinib. (c) Results of cell viability assays after 72 hours of treatment with the indicated drugs in PC-9 cell models with *ESYT2-BRAF* amplification ( $n = 3$  biological replicates, mean  $\pm$  s.d.). (d) Western blot analyses of PC-9<sup>ESYT2-BRAF amp</sup> cells treated with 10 nM trametinib over time, and with siRNA for 48 hours. (e) Synergistic inhibitory effects of RAF709 and trametinib in PC-9<sup>ESYT2-BRAF amp</sup> cells ( $n = 2$  biological replicates, mean). Pseudo-color represents synergy effects. (f) Western blot analyses after 48 hours of treatment with indicated drugs. (g) Representative sequencing chromatograms of *MAP2K1* F129L and *MTOR* K2374N in the DNA of PC-9<sup>ESYT2-BRAF amp</sup> cells that had acquired resistance to RAF709 plus trametinib. (h) Synergistic inhibitory effects in PC-9<sup>ESYT2-BRAF amp</sup> MAP2K1 F129L + *MTOR* K2374N cells ( $n = 2$  biological replicates, mean). Pseudo-color represents synergy effects. (i) Western blot analyses after 48 hours of treatment with 0.5  $\mu$ M osimertinib or RAF709, 10 nM trametinib, 1  $\mu$ M SCH772984, or 50 nM everolimus. Source data of Sup. Fig. 7a-f, h, and i are provided as a Source Data file.

## Supplementary Fig. 8

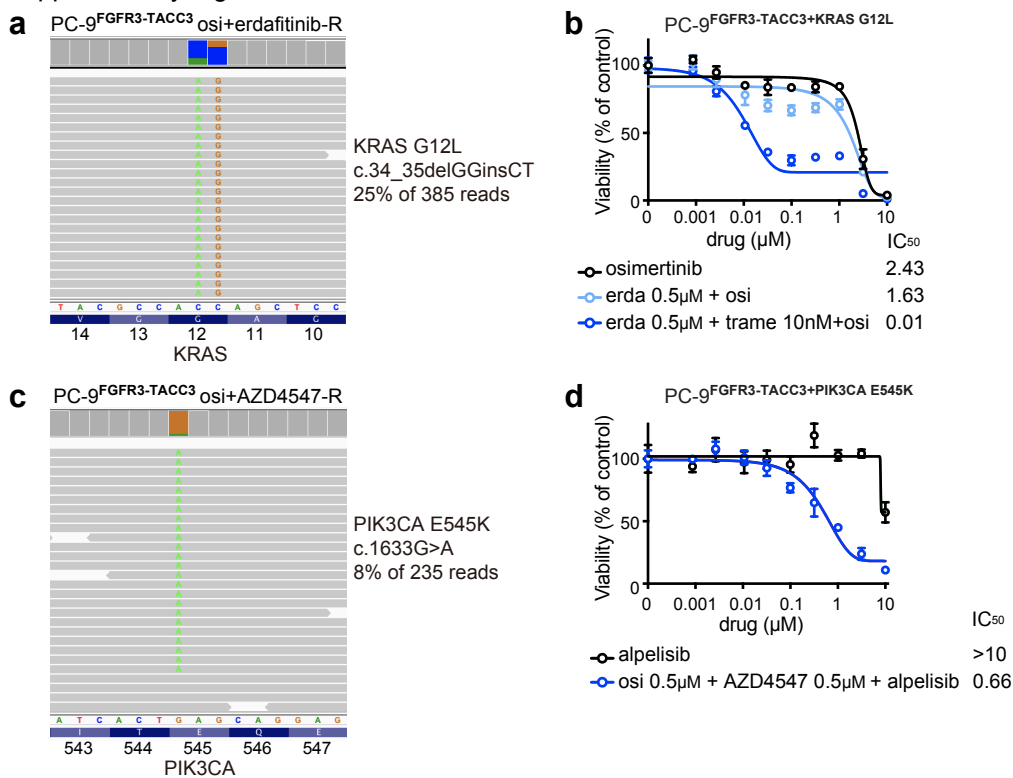

### Supplementary Fig.8. Acquired resistance mechanisms in PC-9<sup>FGFR3-TACC3</sup> cells

(a) *KRAS* mutation detected by DNA-based next generation sequencing OncoPanel in PC-9<sup>FGFR3-TACC3</sup> cells that had acquired resistance to osimertinib plus erdafitinib. (b) Results of cell viability assays after 72 hours of treatment (n = 3 biological replicates, mean  $\pm$  s.d.). (c) *PIK3CA* mutation detected by OncoPanel, after exposure to osimertinib and AZD4547. (d) Results of cell viability assay, following 72 hours of treatment (n = 3 biological replicates, mean  $\pm$  s.d.). Source data of Sup. Fig. 8b and d are provided as a Source Data file.





**Supplementary Table 2**  
Quality check metrics of RNA-seq

| sample ID  | putative fusion detected by DNA-based NGS | Reads Aligned in Pairs | mRNA Bases % (RNA) | Product                                   | Coding Bases % (RNA) | Coding Bases (RNA) | Contamination % | Correct Strand Reads % (RNA) | Correct Strand Reads (RNA) | Duplication % (Library AVG) | Duplication % (Library MAX) | Duplication % (Library MIN) | Incorrect Strand Reads (RNA) | Intergenic Bases % (RNA) | Intergenic Bases (RNA) | Intronic Bases % (RNA) | Intronic Bases (RNA) | Mean Read Length | Median 3Prime Bias (RNA) | Median 5Prime Bias (RNA) | Median 5Prime-3Prime Bias (RNA) | Median CV Coverage (RNA) |
|------------|-------------------------------------------|------------------------|--------------------|-------------------------------------------|----------------------|--------------------|-----------------|------------------------------|----------------------------|-----------------------------|-----------------------------|-----------------------------|------------------------------|--------------------------|------------------------|------------------------|----------------------|------------------|--------------------------|--------------------------|---------------------------------|--------------------------|
| sample 1   | TMEM196-ABL1                              | 61,272,682             | 90.8               | Transcriptome Capture v1                  | 81.5                 | 3,792,782,376      | 4.37            | 98.9                         | 53,533,404                 | 37.48                       | 37.48                       | 37.48                       | 613,372                      | 4                        | 178,816,972            | 5                      | 233,648,980          | 76               | 0                        | 0.02                     | 0                               | 1.1                      |
| sample 2-1 | FGFR1-intergenic                          | 181,728,542            | 86.5               | Transcriptome Capture v1                  | 74.3                 | 10,267,044,236     | 3.75            | 99.2                         | 150,863,920                | 61.68                       | 61.68                       | 61.68                       | 1,174,683                    | 7                        | 972,963,207            | 6                      | 810,807,209          | 76               | 0                        | 0.09                     | 0.18                            | 0.8                      |
| sample 2-1 | FGFR1-intergenic                          | 109,669,086            | 88                 | Transcriptome Capture v1                  | 76                   | 6,353,423,390      | 4.63            | 99                           | 92,419,924                 | 63.187                      | 63.187                      | 63.187                      | 973,147                      | 6                        | 520,310,360            | 6                      | 461,291,593          | 76               | 0                        | 0.04                     | 0                               | 0.9                      |
| sample 3   | DLG1-BRAF                                 | 14,337,242             | 88.7               | Transcriptome Capture v1                  | 77.6                 | 3,604,245,309      | 5.01            | 98.8                         | 51,833,428                 | 82.484                      | 82.484                      | 82.484                      | 618,491                      | 5                        | 246,563,914            | 6                      | 264,930,790          | 76               | 0                        | 0.05                     | 0                               | 0.9                      |
| sample 4   | EBF2-NRG1                                 | 14,337,242             | 90.7               | Transcriptome Capture v1                  | 79.3                 | 863,109,993        | 6.8             | 98.7                         | 12,521,826                 | 64.347                      | 85.662                      | 43.031                      | 168,267                      | 4                        | 48,008,926             | 5                      | 51,240,181           | 76               | 0                        | 0.02                     | 0                               | 0.9                      |
| sample 5   | NPM1-FGFR2                                | 149,863,560            | 88.9               | Transcriptome Capture v1                  | 79.4                 | 9,167,346,139      | 6.07            | 98.9                         | 130,304,930                | 62.499                      | 62.499                      | 62.499                      | 1,439,478                    | 6                        | 662,174,594            | 5                      | 583,585,048          | 76               | 0                        | 0.04                     | 0.04                            | 0.9                      |
| sample 6   | CNO16-MDM4                                | 158,861,854            | 75.4               | Tru-Seq Strand Specific RNA Sequencing v1 | 47.2                 | 7,559,166,741      | 1.62            | 99.7                         | 114,195,080                | 63.59                       | 63.59                       | 63.59                       | 394,652                      | 14                       | 2,191,038,537          | 8                      | 1,329,929,647        | 101              | 0.18                     | 0.25                     | 1.49                            | 0.5                      |
| sample 7   | SLC4A4-GNAS                               | 69,716,012             | 88.7               | Transcriptome Capture v1                  | 75.4                 | 3,980,646,665      | 2.87            | 98.4                         | 59,276,060                 | 48.698                      | 48.698                      | 48.698                      | 987,016                      | 5                        | 271,167,927            | 6                      | 313,357,588          | 76               | 0                        | 0.03                     | 0                               | 1.1                      |
| sample 8   | FKBP5-ESR1                                | 92,034,156             | 89.8               | Transcriptome Capture v1                  | 78.9                 | 5,573,904,845      | 3.17            | 98.4                         | 79,871,986                 | 62.938                      | 62.938                      | 62.938                      | 1,260,208                    | 5                        | 378,755,348            | 5                      | 321,054,260          | 76               | 0                        | 0.03                     | 0                               | 0.9                      |
| sample 9   | BCL6-intergenic                           | 44,430,942             | 84.2               | Transcriptome Capture v1                  | 72.9                 | 2,467,486,379      | 2.68            | 98.4                         | 36,339,120                 | 74.367                      | 74.367                      | 74.367                      | 604,869                      | 9                        | 310,261,877            | 6                      | 209,677,600          | 76               | 0                        | 0.04                     | 0                               | 1                        |
| sample 10  | RET-intergenic                            | 88,843,590             | 79.1               | Transcriptome Capture v1                  | 66.6                 | 4,498,145,926      | 3.47            | 98.1                         | 67,049,630                 | 98.374                      | 98.374                      | 98.374                      | 1,264,869                    | 11                       | 752,205,645            | 7                      | 461,753,836          | 76               | 0                        | 0                        | 0                               | 1.3                      |
| sample 11  | SYNDIG1-GNAS                              | 8,818,222              | 69.2               | Transcriptome Capture v1                  | 62.8                 | 445,976,565        | 0.51            | 98.5                         | 6,213,766                  | 98.086                      | 98.086                      | 98.086                      | 93,189                       | 18                       | 129,545,829            | 12                     | 84,751,890           | 76               | 0                        | 0                        | 0                               | 2.9                      |

| sample ID  | putative fusion detected by DNA-based NGS | PF Bases (BC)  | PF Bases (RNA) | PF Bases Aligned | PF Bases Aligned (RNA) | PF HQ Aligned Bases | PF HQ Aligned Q20 Bases | PF HQ Aligned Reads | PF Mismatch Rate | PF Noise Reads | PF Reads    | PF Reads % | PF Reads Aligned | PF Reads Aligned % | PF Reads Aligned (Paired) | Reads Aligned in Pairs % | Ribosomal Bases % (RNA) | Ribosomal Bases (RNA) | Total Reads | UTR Bases % (RNA) | UTR Bases (RNA) | Usable Bases % (RNA) |
|------------|-------------------------------------------|----------------|----------------|------------------|------------------------|---------------------|-------------------------|---------------------|------------------|----------------|-------------|------------|------------------|--------------------|---------------------------|--------------------------|-------------------------|-----------------------|-------------|-------------------|-----------------|----------------------|
| sample 1   | TMEM196-ABL1                              | 4,759,086,104  | 4,759,086,104  | 4,652,371,771    | 4,652,371,771          | 4,301,823,107       | 4,242,165,270           | 56,930,723          | 0                | 216            | 62,619,554  | 97.7       | 61,658,737       | 98.5               | 61,658,737                | 99.4                     | 0.4                     | 17,663,433            | 64,062,774  | 9.2               | 429,460,010     | 88.7                 |
| sample 2-1 | FGFR1-intergenic                          | 14,013,558,376 | 14,013,558,376 | 13,818,808,091   | 13,818,808,091         | 12,529,784,941      | 12,271,468,405          | 165,431,946         | 0                | 926            | 184,388,926 | 96.6       | 182,571,702      | 99                 | 182,571,702               | 99.5                     | 0.6                     | 77,289,416            | 190,858,632 | 12.2              | 1,690,704,023   | 85.3                 |
| sample 2-1 | FGFR1-intergenic                          | 8,513,995,456  | 8,513,995,456  | 8,359,072,482    | 8,359,072,482          | 7,620,165,642       | 7,477,178,548           | 100,612,982         | 0                | 461            | 112,026,256 | 97.8       | 110,442,846      | 98.6               | 110,442,846               | 96.3                     | 0.2                     | 20,777,968            | 114,580,846 | 12                | 1,003,269,171   | 86.4                 |
| sample 3   | DLG1-BRAF                                 | 4,969,644,408  | 4,969,644,408  | 4,645,872,592    | 4,645,872,592          | 3,632,163,940       | 3,567,436,830           | 48,684,887          | 0                | 501            | 65,390,058  | 97         | 62,952,993       | 96.3               | 62,952,993                | 96.9                     | 0.3                     | 11,961,336            | 67,433,670  | 11.2              | 518,171,243     | 83                   |
| sample 4   | EBF2-NRG1                                 | 160,968        | 1,117,099,832  | 1,088,028,019    | 1,088,028,019          | 993,435,559         | 972,259,788             | 13,180,307          | 0                | 228            | 14,698,682  | 95.7       | 14,473,244       | 98.5               | 14,473,244                | 99.1                     | 0.2                     | 2,193,008             | 15,366,964  | 11.3              | 123,475,911     | 88.3                 |
| sample 5   | NPM1-FGFR2                                | 11,999,590,904 | 11,999,590,904 | 11,541,362,564   | 11,541,362,564         | 10,168,226,774      | 9,637,073,236           | 134,659,785         | 0                | 1,904          | 157,889,354 | 93.8       | 153,126,097      | 97                 | 153,126,097               | 97.9                     | 0.3                     | 29,980,821            | 168,281,664 | 9.5               | 1,098,275,962   | 85.5                 |
| sample 6   | CNO16-MDM4                                | 16,298,474,434 | 16,298,474,434 | 16,021,320,322   | 16,021,320,322         | 15,196,362,970      | 14,985,190,343          | 151,393,594         | 0                | 1,253          | 161,371,034 | 100        | 160,008,386      | 99.2               | 160,008,386               | 99.3                     | 2.6                     | 420,329,531           | 161,371,034 | 28.2              | 4,520,855,966   | 74.1                 |
| sample 7   | SLC4A4-GNAS                               | 5,420,283,368  | 5,420,283,368  | 5,282,044,121    | 5,282,044,121          | 4,844,920,217       | 4,813,500,645           | 84,244,409          | 0                | 1,534          | 71,319,518  | 94.2       | 70,185,215       | 98.4               | 70,185,215                | 99.3                     | 0.2                     | 11,296,964            | 75,745,272  | 13.4              | 705,575,377     | 86.5                 |
| sample 8   | FKBP5-ESR1                                | 7,294,448,536  | 7,294,448,536  | 7,068,235,020    | 7,068,235,020          | 6,404,594,775       | 6,288,397,560           | 84,773,163          | 0                | 703            | 95,979,586  | 96.8       | 93,664,797       | 97.6               | 93,664,797                | 98.3                     | 0.3                     | 24,285,796            | 99,161,876  | 10.9              | 770,234,771     | 87                   |
| sample 9   | BCL6-intergenic                           | 3,517,274,224  | 3,517,274,224  | 3,382,744,744    | 3,382,744,744          | 2,998,160,170       | 2,961,717,305           | 39,753,917          | 0                | 1,903          | 46,279,924  | 98.6       | 44,946,998       | 97.1               | 44,946,998                | 98.9                     | 0.4                     | 14,004,578            | 46,922,478  | 11.3              | 381,314,310     | 81                   |
| sample 10  | RET-intergenic                            | 6,880,254,008  | 6,880,254,008  | 6,749,411,689    | 6,749,411,689          | 5,701,168,743       | 5,611,512,571           | 75,395,681          | 0                | 544            | 90,529,658  | 97.3       | 89,319,609       | 98.7               | 89,319,609                | 99.5                     | 2.9                     | 193,421,523           | 93,072,714  | 12.5              | 843,884,759     | 77.6                 |
| sample 11  | SYNDIG1-GNAS                              | 818,202,168    | 818,202,168    | 710,689,786      | 710,689,786            | 561,829,832         | 549,481,061             | 7,558,611           | 0                | 1,082,690      | 10,765,818  | 97.7       | 9,608,584        | 89.3               | 9,608,584                 | 91.8                     | 0.7                     | 4,794,714             | 11,016,834  | 6.4               | 45,620,788      | 60.1                 |

**Supplementary Table 3**

Candidate fusions detected by at least 2 fusion callers based on the RNA-seq data

| sample number | fusions detected by DNA-base Oncopanel | putative fusions detected by RNA-seq and at least 2 fusion callers                                                                                                                                                                                                                                                                                                                                                                                                                                                                                                                                                                                          | sample number | fusions detected by DNA-base Oncopanel | putative fusions detected by RNA-seq and at least 2 fusion callers                                                                                                                                       |
|---------------|----------------------------------------|-------------------------------------------------------------------------------------------------------------------------------------------------------------------------------------------------------------------------------------------------------------------------------------------------------------------------------------------------------------------------------------------------------------------------------------------------------------------------------------------------------------------------------------------------------------------------------------------------------------------------------------------------------------|---------------|----------------------------------------|----------------------------------------------------------------------------------------------------------------------------------------------------------------------------------------------------------|
| 1             | TMEM196-ABL1                           | ABCA13--ZBPB<br>AKAP9--CNTNAP2<br>CNTNAP2--AKAP9<br>CTSC--RAB38<br>HDAC9--CNTNAP2<br>KANSL1--ARL17A<br>KANSL1--ARL17B<br>NCOR1--TPX2<br>PON3--AC099342.1<br>RP11-89K10.1--ANXA13<br>SAMD5--SASH1<br>TAF2--TRPS1<br>TRIM2--FSTL5                                                                                                                                                                                                                                                                                                                                                                                                                             | 3             | DLG1-BRAF                              | BRAF--DLG1<br>DLG1--BRAF<br>PFKFB3--RP11-563J2.2<br>RP11-123O10.4--GRIP1                                                                                                                                 |
| 2-1           | FGFR1-intergenic                       | AKR1C1--AKR1E2<br>AP3S1--AQPEP<br>APLP2--RNASE1<br>BNIP3L--DPYSL2<br>C10orf112--PLXDC2<br>C5orf56--RAD50<br>CHD9--SNTB2<br>CMTM8--CMTM7<br>CTC-786C10.1--RP11-680G1<br>CTD-2337A12.1--CAST<br>EIF4E3--FOXP1<br>HM13--NAV2<br>LINC00670--MYOCD<br>METTL13--DNM3<br>NDUFV3--PKNOX1<br>PARVA--VAPB<br>PFKFB3--RP11-563J2.2<br>PVT1--C8orf47<br>RP1-34H18.1--NAV3<br>RP11-120D5.1--MID1<br>RP11-123O10.4--GRIP1<br>RP11-141M1.3--STARD13<br>RP11-275N1.1--NEBL<br>RP11-381K20.2--KLHL3<br>RP11-444D3.1--SOX5<br>RP11-680G10.1--GSE1<br>RP11-98I9.4--TSTD3<br>RP3-323P24.3--FAAH2<br>SAMD5--SASH1<br>TCF3--AC009120.4<br>TMED3--KIAA1024<br>TULP4--RP11-732M18.3 | 4             | EBF2-NRG1                              | RP11-123O10.4--GRIP1<br>WWC1--RARS                                                                                                                                                                       |
|               |                                        |                                                                                                                                                                                                                                                                                                                                                                                                                                                                                                                                                                                                                                                             | 5             | NPM1-FGFR2                             | CTSC--RAB38<br>EIF4E3--FOXP1<br>NDUFV3--PKNOX1<br>PFKFB3--RP11-563J2.2<br>RP1-34H18.1--NAV3<br>RP11-123O10.4--GRIP1<br>RP11-444D3.1--SOX5<br>RP11-680G10.1--GSE1<br>SAMD5--SASH1<br>TULP4--RP11-732M18.3 |
|               |                                        |                                                                                                                                                                                                                                                                                                                                                                                                                                                                                                                                                                                                                                                             | 6             | CNOT6-MDM4                             | ATF6--ATP2B4<br>CTSC--RAB38<br>DLG1--BRAF<br>RABGAP1L--FGF18<br>RUFY1--LGR6<br>YY1AP1--DUSP12                                                                                                            |
|               |                                        |                                                                                                                                                                                                                                                                                                                                                                                                                                                                                                                                                                                                                                                             | 7             | SLC4A4-GNAS                            | AKR1C1--AKR1E2<br>C5orf56--RAD50<br>MCF2L--DYNC111<br>RP11-680G10.1--GSE1<br>TNS3--SUN3                                                                                                                  |
|               |                                        |                                                                                                                                                                                                                                                                                                                                                                                                                                                                                                                                                                                                                                                             | 8             | FKBP5-ESR1                             | AHR--TMEM39A<br>KANSL1--ARL17A<br>KANSL1--ARL17B<br>PFKFB3--RP11-563J2.2<br>RP1-34H18.1--NAV3<br>RP11-123O10.4--GRIP1<br>RP11-444D3.1--SOX5<br>RP11-680G10.1--GSE1                                       |
|               |                                        |                                                                                                                                                                                                                                                                                                                                                                                                                                                                                                                                                                                                                                                             | 9             | BCL6-intergenic                        | C9orf3--SORCS1<br>PLEKHA7--TP53I11                                                                                                                                                                       |
|               |                                        |                                                                                                                                                                                                                                                                                                                                                                                                                                                                                                                                                                                                                                                             | 10            | RET-intergenic                         | no                                                                                                                                                                                                       |
|               |                                        |                                                                                                                                                                                                                                                                                                                                                                                                                                                                                                                                                                                                                                                             | 11            | SYNDIG1-GNAS                           | no                                                                                                                                                                                                       |
| 2-2           | FGFR1-intergenic                       | C5orf56--RAD50<br>HM13--NAV2<br>LINC00670--MYOCD<br>PVT1--C8orf47<br>RP1-34H18.1--NAV3<br>RP11-123O10.4--GRIP1<br>RP11-275N1.1--NEBL<br>RP11-444D3.1--SOX5<br>RP11-680G10.1--GSE1<br>RP3-323P24.3--FAAH2<br>SAMD5--SASH1<br>TCF3--AC009120.4<br>TULP4--RP11-732M18.3                                                                                                                                                                                                                                                                                                                                                                                        |               |                                        |                                                                                                                                                                                                          |



**Supplementary Table 4**

Summary of mechanisms of acquired resistance to inhibition of EGFR and fusion genes

| <b>fusion</b>      | <b>initial drug</b>                                                       | <b>resistant mechanism</b>                                                                                                      | <b>strategy to overcome</b>                                                                                      |
|--------------------|---------------------------------------------------------------------------|---------------------------------------------------------------------------------------------------------------------------------|------------------------------------------------------------------------------------------------------------------|
| <i>CCDC6-RET</i>   | alectinib + osi<br>pralsetinib + osi<br>selpercatinib + osi<br>vandetanib | amplification of <i>CCDC6-RET</i><br><i>RET</i> G810S<br>amplification of wild type <i>EGFR</i><br>amplification of <i>YAP1</i> | selpercatinib or pralsetinib + osi<br>ponatinib + osi<br>afatinib or dacomitinib + osi<br>alisertib + vandetanib |
| <i>ESYT2-BRAF</i>  | trametinib + osi<br>RAF709 + trametinib                                   | amplification of <i>ESYT2-BRAF</i><br><i>MAP2K1</i> F129L + <i>MTOR</i> K2374N                                                  | RAF709 + trametinib<br>SCH772984 + everolimus                                                                    |
| <i>FGFR3-TACC3</i> | erdafitinib + osi<br>AZD4547 + osi                                        | <i>KRAS</i> G12L<br><i>PIK3CA</i> E545K                                                                                         | trametinib + erdafitinib + osi<br>alpelisib + AZD4547 + osi                                                      |

**Supplementary Table 5**

Time to acquiring resistance to drugs in PC-9 CCDC6-RET models

| cell line                                    | drugs                       | time to resistance |          | resistant mechanism                    |
|----------------------------------------------|-----------------------------|--------------------|----------|----------------------------------------|
|                                              |                             | days               | (months) |                                        |
| PC-9 <sup>CCDC6-RET</sup>                    | osimertinib + alectinib     | 73                 | (2.4)    | amplification of <i>CCDC6-RET</i>      |
| PC-9 <sup>CCDC6-RET</sup>                    | vandetanib                  | 73                 | (2.4)    | amplification of <i>YAP1</i>           |
| PC-9 <sup>CCDC6-RET</sup>                    | osimertinib + selpercatinib | 122                | (4.1)    | amplification of wild type <i>EGFR</i> |
| PC-9 <sup>CCDC6-RET</sup><br>osi+alectinib-R | osimertinib + pralsetinib   | 178*               | (5.9)*   | <i>RET</i> G810S                       |

\*only duration of treatment with osi/pralsetinib
