# Supplementary material for: Genomic and biological study of fusion genes as resistance mechanisms to EGFR inhibitors
Source: PubMed Central journal article supplement (PMC9509394; doi:10.1038/s41467-022-33210-2), 2022-09-24
Supplement: 41467_2022_33210_MOESM3_ESM.pdf [file 41467_2022_33210_MOESM3_ESM.pdf]

## Reporting Summary

Nature Research wishes to improve the reproducibility of the work that we publish. This form provides structure for consistency and transparency in reporting. For further information on Nature Research policies, see our [Editorial Policies](#) and the [Editorial Policy Checklist](#).

### Statistics

For all statistical analyses, confirm that the following items are present in the figure legend, table legend, main text, or Methods section.

n/a Confirmed

- The exact sample size ( $n$ ) for each experimental group/condition, given as a discrete number and unit of measurement
- A statement on whether measurements were taken from distinct samples or whether the same sample was measured repeatedly
- The statistical test(s) used AND whether they are one- or two-sided  
*Only common tests should be described solely by name; describe more complex techniques in the Methods section.*
- A description of all covariates tested
- A description of any assumptions or corrections, such as tests of normality and adjustment for multiple comparisons
- A full description of the statistical parameters including central tendency (e.g. means) or other basic estimates (e.g. regression coefficient) AND variation (e.g. standard deviation) or associated estimates of uncertainty (e.g. confidence intervals)
- For null hypothesis testing, the test statistic (e.g.  $F$ ,  $t$ ,  $r$ ) with confidence intervals, effect sizes, degrees of freedom and  $P$  value noted  
*Give  $P$  values as exact values whenever suitable.*
- For Bayesian analysis, information on the choice of priors and Markov chain Monte Carlo settings
- For hierarchical and complex designs, identification of the appropriate level for tests and full reporting of outcomes
- Estimates of effect sizes (e.g. Cohen's  $d$ , Pearson's  $r$ ), indicating how they were calculated

*Our web collection on [statistics for biologists](#) contains articles on many of the points above.*

### Software and code

Policy information about [availability of computer code](#)

**Data collection** EPSON perfection V750 pro (colony formation assay), BIO-RAD UNIVERSAL HOOD II Gel Documentation System with CFW-1312M Camera (images of PCR bands), StepOnePlus Real-Time PCR System (Quantitative RT-PCR data), FLUOstar Omega (Cell growth-inhibition assay), Amersham Imager 600 (Western blot), BD LSR Fortessa flow cytometer (flow cytometry), IncuCyteS3 Live-Cell Imaging Analysis System (Essen Bioscience)

**Data analysis** SnapGene 4.1.9 (sequencing chromatogram), StepOne Software v2.3 (Quantitative RT-PCR), ImageQuant TL1D v8.2 (Western blot analysis), GraphPad Prism v9.0.0, SAS 9.4, Integrative Genomics Viewer (IGV) (version 2.8.0), FlowJo v10 (FlowJo, LLC), Combenefit v.2.021

For manuscripts utilizing custom algorithms or software that are central to the research but not yet described in published literature, software must be made available to editors and reviewers. We strongly encourage code deposition in a community repository (e.g. GitHub). See the Nature Research [guidelines for submitting code & software](#) for further information.

### Data

Policy information about [availability of data](#)

All manuscripts must include a [data availability statement](#). This statement should provide the following information, where applicable:

- Accession codes, unique identifiers, or web links for publicly available datasets
- A list of figures that have associated raw data
- A description of any restrictions on data availability

Raw fastq files of RNA-seq data from clinical samples generated in this study have been deposited in the NCBI GEO database under accession code GSE182323 [<https://www.ncbi.nlm.nih.gov/geo/query/acc.cgi?acc=GSE182323>]. Protein data were obtained from PDB ID 6NEC [<https://www.rcsb.org/structure/6NEC>] and 4U0I [<https://www.rcsb.org/structure/4U0I>]. Analyzed OncoPanel data in this manuscript were deposited into AACR GENIE project for public access [<https://>

## Field-specific reporting

Please select the one below that is the best fit for your research. If you are not sure, read the appropriate sections before making your selection.

Life sciences  Behavioural & social sciences  Ecological, evolutionary & environmental sciences

For a reference copy of the document with all sections, see [nature.com/documents/nr-reporting-summary-flat.pdf](https://www.nature.com/documents/nr-reporting-summary-flat.pdf)

## Life sciences study design

All studies must disclose on these points even when the disclosure is negative.

|                 |                                                                                                                                                                                                                                                                                                                            |
|-----------------|----------------------------------------------------------------------------------------------------------------------------------------------------------------------------------------------------------------------------------------------------------------------------------------------------------------------------|
| Sample size     | A sample size of two to four replicates was selected for in vitro experiments, which were then confirmed via independent replication studies. Quantitative proteomics experiments were performed using n=2 biologically independent samples, which was expected to yield significant results based on previous experience. |
| Data exclusions | No data were excluded.                                                                                                                                                                                                                                                                                                     |
| Replication     | All experiments have been performed in at least two independent experiments. All replication attempts were successful.                                                                                                                                                                                                     |
| Randomization   | Wells of cells were randomly assigned to control or treatment groups.                                                                                                                                                                                                                                                      |
| Blinding        | RNA sequencing was blinded. All other experiments were not blinded; blinding was not applicable to this study as data collection and analysis was not prone to bias.                                                                                                                                                       |

## Reporting for specific materials, systems and methods

We require information from authors about some types of materials, experimental systems and methods used in many studies. Here, indicate whether each material, system or method listed is relevant to your study. If you are not sure if a list item applies to your research, read the appropriate section before selecting a response.

### Materials & experimental systems

| n/a                                 | Involved in the study                                           |
|-------------------------------------|-----------------------------------------------------------------|
| <input type="checkbox"/>            | <input checked="" type="checkbox"/> Antibodies                  |
| <input type="checkbox"/>            | <input checked="" type="checkbox"/> Eukaryotic cell lines       |
| <input checked="" type="checkbox"/> | <input type="checkbox"/> Palaeontology and archaeology          |
| <input checked="" type="checkbox"/> | <input type="checkbox"/> Animals and other organisms            |
| <input type="checkbox"/>            | <input checked="" type="checkbox"/> Human research participants |
| <input checked="" type="checkbox"/> | <input type="checkbox"/> Clinical data                          |
| <input checked="" type="checkbox"/> | <input type="checkbox"/> Dual use research of concern           |

### Methods

| n/a                                 | Involved in the study                              |
|-------------------------------------|----------------------------------------------------|
| <input checked="" type="checkbox"/> | <input type="checkbox"/> ChIP-seq                  |
| <input type="checkbox"/>            | <input checked="" type="checkbox"/> Flow cytometry |
| <input checked="" type="checkbox"/> | <input type="checkbox"/> MRI-based neuroimaging    |

## Antibodies

|                 |                                                                                                                                                                                                                                                                                                                                                                                                                                                                                                                                                                                                                                                                                                                                                                                                                                                                                                                                                                                                                                                                                                                                                                                                                                                                                                                                                                                                                                                                                                                                                                                                                                                                                                                                                                                                                                                                                                                                                                                                                                                                                                                                                                                                                                                                                                                                                                                                                                                                                                                                                                                                                                                                                                                                                                                                                                                                                                                                                                                                                                                                                                                                                                                                                                                                                                                                                                                                                                                                                                                                                                                                                                                                                                 |
|-----------------|-------------------------------------------------------------------------------------------------------------------------------------------------------------------------------------------------------------------------------------------------------------------------------------------------------------------------------------------------------------------------------------------------------------------------------------------------------------------------------------------------------------------------------------------------------------------------------------------------------------------------------------------------------------------------------------------------------------------------------------------------------------------------------------------------------------------------------------------------------------------------------------------------------------------------------------------------------------------------------------------------------------------------------------------------------------------------------------------------------------------------------------------------------------------------------------------------------------------------------------------------------------------------------------------------------------------------------------------------------------------------------------------------------------------------------------------------------------------------------------------------------------------------------------------------------------------------------------------------------------------------------------------------------------------------------------------------------------------------------------------------------------------------------------------------------------------------------------------------------------------------------------------------------------------------------------------------------------------------------------------------------------------------------------------------------------------------------------------------------------------------------------------------------------------------------------------------------------------------------------------------------------------------------------------------------------------------------------------------------------------------------------------------------------------------------------------------------------------------------------------------------------------------------------------------------------------------------------------------------------------------------------------------------------------------------------------------------------------------------------------------------------------------------------------------------------------------------------------------------------------------------------------------------------------------------------------------------------------------------------------------------------------------------------------------------------------------------------------------------------------------------------------------------------------------------------------------------------------------------------------------------------------------------------------------------------------------------------------------------------------------------------------------------------------------------------------------------------------------------------------------------------------------------------------------------------------------------------------------------------------------------------------------------------------------------------------------|
| Antibodies used | All antibodies were described in Supplementary Table 6.                                                                                                                                                                                                                                                                                                                                                                                                                                                                                                                                                                                                                                                                                                                                                                                                                                                                                                                                                                                                                                                                                                                                                                                                                                                                                                                                                                                                                                                                                                                                                                                                                                                                                                                                                                                                                                                                                                                                                                                                                                                                                                                                                                                                                                                                                                                                                                                                                                                                                                                                                                                                                                                                                                                                                                                                                                                                                                                                                                                                                                                                                                                                                                                                                                                                                                                                                                                                                                                                                                                                                                                                                                         |
| Validation      | All antibodies are commercially available and the validation information found on suppliers' web page is as follows: p-EGFR (suitable for: WB, IHC, IF, F; reacts with: human, mouse, rat, monkey; <a href="https://www.cellsignal.com/products/primary-antibodies/phospho-egf-receptor-tyr1068-d7a5-xp-rabbit-mab/3777">https://www.cellsignal.com/products/primary-antibodies/phospho-egf-receptor-tyr1068-d7a5-xp-rabbit-mab/3777</a> ); EGFR (suitable for: WB, IP, IHC, IF, F; reacts with: human, mouse, monkey; <a href="https://www.cellsignal.com/products/primary-antibodies/egf-receptor-d38b1-xp-rabbit-mab/4267">https://www.cellsignal.com/products/primary-antibodies/egf-receptor-d38b1-xp-rabbit-mab/4267</a> ); p-RET (suitable for: WB, IP; reacts with: human, D. melanogaster; <a href="https://www.cellsignal.com/products/primary-antibodies/phospho-ret-tyr905-antibody/3221">https://www.cellsignal.com/products/primary-antibodies/phospho-ret-tyr905-antibody/3221</a> ); RET (suitable for: WB, IP, IF, F; reacts with: human, mouse; <a href="https://www.cellsignal.com/products/primary-antibodies/ret-c31b4-rabbit-mab/3223">https://www.cellsignal.com/products/primary-antibodies/ret-c31b4-rabbit-mab/3223</a> ); p-BRAF (suitable for: WB; reacts with: human, mouse, rat, monkey; <a href="https://www.cellsignal.com/products/primary-antibodies/phospho-b-raf-ser445-antibody/2696">https://www.cellsignal.com/products/primary-antibodies/phospho-b-raf-ser445-antibody/2696</a> ); BRAF (suitable for: WB, IP, IF, IHC(P, ELISA); reacts with: mouse, rat, human; <a href="https://www.scbt.com/p/raf-b-antibody-f-7?productCanUrl=raf-b-antibody-f-7&amp;_requestid=3694081">https://www.scbt.com/p/raf-b-antibody-f-7?productCanUrl=raf-b-antibody-f-7&amp;_requestid=3694081</a> ); FGFR3 (suitable for: WB, IP, IF, IHC(P, ELISA); reacts with: human; <a href="https://www.scbt.com/p/fgfr-3-antibody-b-9?requestFrom=search">https://www.scbt.com/p/fgfr-3-antibody-b-9?requestFrom=search</a> ); p-ALK (suitable for: WB, IP; reacts with: human; <a href="https://www.cellsignal.com/products/primary-antibodies/phospho-alk-tyr1604-antibody/3341">https://www.cellsignal.com/products/primary-antibodies/phospho-alk-tyr1604-antibody/3341</a> ); ALK (suitable for: WB, IP, IHC, F; reacts with: human; <a href="https://www.cellsignal.com/products/primary-antibodies/alk-d5f3-xp-rabbit-mab/3633">https://www.cellsignal.com/products/primary-antibodies/alk-d5f3-xp-rabbit-mab/3633</a> ); p-MEK (suitable for: WB, IP; reacts with: human, mouse, rat, monkey; <a href="https://www.cellsignal.com/products/primary-antibodies/phospho-mek1-2-ser217-221-41g9-rabbit-mab/9154">https://www.cellsignal.com/products/primary-antibodies/phospho-mek1-2-ser217-221-41g9-rabbit-mab/9154</a> ); MEK (suitable for: WB, IP; reacts with: human, mouse, rat, monkey, D. melanogaster; <a href="https://www.cellsignal.com/products/primary-antibodies/mek1-2-antibody/9122">https://www.cellsignal.com/products/primary-antibodies/mek1-2-antibody/9122</a> ); p-ERK (suitable for: WB, IP, IHC, IF, FC; reacts with: human, mouse, rat, hamster, monkey, mink, D. melanogaster, zebrafish, bovine, dog, pig, S. cerevisiae; <a href="https://www.cellsignal.com/products/primary-antibodies/phospho-p44-42-mapk-erk1-2-thr202-tyr204-d13-14-4e-xp-rabbit-mab/4370">https://www.cellsignal.com/products/primary-antibodies/phospho-p44-42-mapk-erk1-2-thr202-tyr204-d13-14-4e-xp-rabbit-mab/4370</a> ); t-ERK (suitable for: WB, IP, IHC, IF, FC; reacts with: human, mouse, rat, hamster, monkey, mink, D. melanogaster, zebrafish, bovine, |

dog, pig, *S. cerevisiae*; <https://www.cellsignal.com/products/primary-antibodies/p44-42-mapk-erk1-2-137f5-rabbit-mab/4695>); p-AKT (suitable for: WB, IP, IHC, IF, FC; reacts with: human, mouse, rat, hamster, monkey, *D. melanogaster*, zebrafish, bovine; <https://www.cellsignal.com/products/primary-antibodies/phospho-akt-ser473-d9e-xp-rabbit-mab/4060>), p-S6 (suitable for: WB, IHC, IF, F; reacts with: human, mouse, rat, monkey, *S. cerevisiae*; <https://www.cellsignal.com/products/primary-antibodies/phospho-s6-ribosomal-protein-ser235-236-d57-2-2e-xp-rabbit-mab/4858>), Cleaved PARP (suitable for: WB, IP, IHC, IF, FC; reacts with: human, monkey; <https://www.cellsignal.com/products/primary-antibodies/cleaved-parp-asp214-d64e10-xp-rabbit-mab/5625>); BIM (suitable for: WB, IP, IHC, IF, FC; reacts with: human, mouse, rat; <https://www.cellsignal.com/products/primary-antibodies/bim-c34c5-rabbit-mab/2933>); p-YAP (suitable for: WB, IP, IHC; reacts with: human, mouse, rat; <https://www.cellsignal.com/products/primary-antibodies/phospho-yap-ser127-d9w2i-rabbit-mab/13008>); YAP (suitable for: WB, IP, IHC, IF, F, ChIP, CUT&RUN; reacts with: human, mouse, rat, Hamster, Monkey; <https://www.cellsignal.com/products/primary-antibodies/yap-d8h1x-xp-rabbit-mab/14074>); p62 (suitable for: WB, IP, IHC, IF, FC, CoIP, ELISA; reacts with: human, mouse, rat; <https://www.ptglab.com/products/SQSTM1-Antibody-18420-1-AP.htm>); LC3B (suitable for: WB, IF, F; reacts with: human; <https://www.cellsignal.com/products/primary-antibodies/lc3b-d11-xp-rabbit-mab/3868>); p-AURKA (suitable for: WB, IF; reacts with: human; <https://www.cellsignal.com/products/primary-antibodies/phospho-aurora-a-thr288-c39d8-rabbit-mab/3079>); p-MET (suitable for: WB, IP, IHC, IF, F; reacts with: human, mouse, rat; <https://www.cellsignal.com/products/primary-antibodies/phospho-met-tyr1234-1235-d26-xp-rabbit-mab/3077>); MET (suitable for: WB, IP, IHC, IF, F; reacts with: human; <https://www.cellsignal.com/products/primary-antibodies/met-d1c2-xp-rabbit-mab/8198>); b-actin (suitable for: WB; reacts with: pig, *Hirudo medicinalis*, bovine, rat, canine, feline, human, rabbit, carp, mouse, guinea pig, chicken, sheep; <https://www.sigmaaldrich.com/US/en/product/sigma/a3854>); HSP90 (suitable for: WB, IP, IF, FC, ELISA; reacts with: mouse, rat, human: the vendor cites a paper showing detection of HSP90 by immunoblotting in human neuroblastoma cell lines PMID: # 20655465 Hölzel, M. et al. 2010. Cell. 142: 218-229; <https://www.scbt.com/p/hsp-90alpha-beta-antibody-h-114?requestFrom=search>)

## Eukaryotic cell lines

Policy information about [cell lines](#)

|                                                                   |                                                                                                                                                          |
|-------------------------------------------------------------------|----------------------------------------------------------------------------------------------------------------------------------------------------------|
| Cell line source(s)                                               | The PC-9 cell line was originally established in Tokyo Medical University and obtained from Dr. Nishio Kazuto (Kindai University, Osaka, Japan) in 2005. |
| Authentication                                                    | The PC-9 cell line was confirmed by fingerprinting.                                                                                                      |
| Mycoplasma contamination                                          | All cell lines were periodically tested negative for Mycoplasma throughout the study.                                                                    |
| Commonly misidentified lines (See <a href="#">ICLAC</a> register) | None were misidentified.                                                                                                                                 |

## Human research participants

Policy information about [studies involving human research participants](#)

|                            |                                                                                                                                                                                                                                                                                                                                                                                                                                                                                                                  |
|----------------------------|------------------------------------------------------------------------------------------------------------------------------------------------------------------------------------------------------------------------------------------------------------------------------------------------------------------------------------------------------------------------------------------------------------------------------------------------------------------------------------------------------------------|
| Population characteristics | Using an IRB-approved protocol with written informed consent, a pan-cancer cohort (n=22,742) analyzed by DNA-based hybrid capture NGS OncoPanel at the Dana-Farber Cancer Institute/Brigham and Women's hospital was queried, to find patients with NSCLCs that harbored a sensitizing EGFR mutation as well as fusions. A patient with an EGFR del19 adenocarcinoma which acquired putative GKAP1-NTRK2 fusion detected by hybrid capture RNA-based targeted sequencing in Hospital Sírio-Libanês was included. |
| Recruitment                | Participants at the Dana-Farber Cancer Institute/Brigham and Women's hospital were queried unbiasedly from a pan-cancer cohort. A participant in Hospital Sírio-Libanês was included based on the clinical importance of the detected putative GKAP1-NTRK2 fusion with an activating EGFR del19 mutation.                                                                                                                                                                                                        |
| Ethics oversight           | DFCI IRB and the Hospital Sírio-Libanês IRB approved the protocol for this study. Patients provided written informed consent according to CARE guidelines and in compliance with the Declaration of Helsinki principles.                                                                                                                                                                                                                                                                                         |

Note that full information on the approval of the study protocol must also be provided in the manuscript.

## Flow Cytometry

### Plots

Confirm that:

- The axis labels state the marker and fluorochrome used (e.g. CD4-FITC).
- The axis scales are clearly visible. Include numbers along axes only for bottom left plot of group (a 'group' is an analysis of identical markers).
- All plots are contour plots with outliers or pseudocolor plots.
- A numerical value for number of cells or percentage (with statistics) is provided.

### Methodology

|                    |                                                                                                                                                                                                                                               |
|--------------------|-----------------------------------------------------------------------------------------------------------------------------------------------------------------------------------------------------------------------------------------------|
| Sample preparation | Cells were washed in PBS+10% FBS, fixed for 10 minutes at room temperature in 2% paraformaldehyde, washed in PBS+10% BS, and permeabilized in cold 90% methanol for 30 minutes on ice; they were then washed and incubated for 1 hour at room |
|--------------------|-----------------------------------------------------------------------------------------------------------------------------------------------------------------------------------------------------------------------------------------------|

temperature in an anti-RET antibody solution (1:50) in PBS+10% FBS, washed and stained with anti-rabbit Alexa Fluor 488 secondary antibody (1:500; 30 minutes, room temperature). Cells were washed, resuspended in PBS+10% FBS, and analyzed.

Instrument

Samples were analyzed on a BD LSR Fortessa flow cytometer (BD Biosciences).

Software

Data were shown using FlowJo v10 (FlowJo, LLC).

Cell population abundance

Cells (3 x 100,000) were used.

Gating strategy

Gating based on 1) FSC area vs SSC area; 2) FSC height vs width and SSC height vs width were used to gate single cells.

Tick this box to confirm that a figure exemplifying the gating strategy is provided in the Supplementary Information.
